# Supplementary material
Source: PubMed Central journal article supplement (PMC8837272)
Supplement: mmc1.pdf [file mmc1.pdf]

**Supplemental information**

**SARS-CoV-2 prolonged infection during advanced**

**HIV disease evolves extensive immune escape**

**Sandile Cele, Farina Karim, Gila Lustig, James Emmanuel San, Tandile Hermanus, Houriiyah Tegally, Jumari Snyman, Thandeka Moyo-Gwete, Eduan Wilkinson, Mallory Bernstein, Khadija Khan, Shi-Hsia Hwa, Sasha W. Tilles, Lavanya Singh, Jennifer Giandhari, Ntombifuthi Mthabela, Matilda Mazibuko, Yashica Ganga, Bernadett I. Gosnell, Salim S. Abdool Karim, Willem Hanekom, Wesley C. Van Voorhis, Thumbi Ndung'u, COMMIT-KZN Team, Richard J. Lessells, Penny L. Moore, Mahomed-Yunus S. Moosa, Tulio de Oliveira, and Alex Sigal**

# Supplementary materials for SARS-CoV-2 prolonged infection during advanced HIV disease evolves extensive immune escape

Cele et al.

## Contents

|          |                                                                                                                              |          |
|----------|------------------------------------------------------------------------------------------------------------------------------|----------|
| <b>1</b> | <b>Table S1: Characteristics of SARS-CoV-2 convalescent or vaccinated study participants related to Figures 1 and 2</b>      | <b>2</b> |
| <b>2</b> | <b>Table S2: Read counts of majority and minority genotypes detected in swab and outgrown virus related to Figure 2</b>      | <b>3</b> |
| <b>3</b> | <b>Figure S1: Spike specific antibody levels with time post-SARS-CoV-2 diagnosis related to Figure 2.</b>                    | <b>4</b> |
| <b>4</b> | <b>Figure S2: Neutralization of Beta variant and evolved virus by a subset of BNT162b2 plasma donors related to Figure 2</b> | <b>4</b> |

1 Table S1: Characteristics of SARS-CoV-2 convalescent or vaccinated study participants related to Figures 1 and 2

| Participant number | Infected or BNT162b2 vaccinated | Variant/strain by infection date | Variant/strain by sequencing | Sequence ID      | GISAID Accession | Age range (y) | Sex | Symptom onset or vaccination to plasma collection (days) |
|--------------------|---------------------------------|----------------------------------|------------------------------|------------------|------------------|---------------|-----|----------------------------------------------------------|
| 1                  | Infected                        | Ancestral                        | B.1.1.273                    | K008646          | EPI_ISL_2397308  | 30-39         | F   | 6, 20, 26, 34, 71, 106, 190                              |
| 2                  | Infected                        | Ancestral                        | B.1.1                        | K003667          | EPI_ISL_602623   | 50-59         | M   | 29                                                       |
| 3                  | Infected                        | Ancestral                        | B.1.1.273                    | K003675          | EPI_ISL_602631   | 40-49         | F   | 32                                                       |
| 4                  | Infected                        | Ancestral                        | B.1.1.117                    | K003668          | EPI_ISL_602624   | 70+           | F   | 29                                                       |
| 5                  | Infected                        | Ancestral                        | B.1.1                        | K004289          | EPI_ISL_660170   | 60-69         | F   | 27                                                       |
| 6                  | Infected                        | Ancestral                        | B.1.140                      | K004295          | EPI_ISL_660176   | 60-69         | F   | 28                                                       |
| 7                  | Infected                        | Ancestral                        | B.1.1.84                     | K003673          | EPI_ISL_602629   | 40-49         | F   | 28                                                       |
| 8                  | Infected                        | Ancestral                        | B.1                          | K004291          | EPI_ISL_660172   | 30-39         | F   | 30                                                       |
| 9                  | Infected                        | Ancestral                        | C.9                          | K004302          | EPI_ISL_660181   | 60-69         | M   | 26                                                       |
| 10                 | Infected                        | Beta                             | Beta                         | K008635          | N/A*             | 40-49         | F   | 30                                                       |
| 11                 | Infected                        | Beta                             | Beta                         | K008636          | N/A*             | 40-49         | F   | 41                                                       |
| 12                 | Infected                        | Beta                             | Beta                         | K008628          | N/A*             | 40-49         | M   | 32                                                       |
| 13                 | Infected                        | Beta                             | Beta                         | K008637          | EPI_ISL_1229368  | 50-59         | M   | 42                                                       |
| 14                 | Infected                        | Beta                             | N/A <sup>§</sup>             | N/A <sup>§</sup> | N/A              | 30-39         | F   | 32                                                       |
| 15                 | Infected                        | Beta                             | Beta                         | K010372          | N/A*             | 30-39         | M   | 33                                                       |
| 16                 | Infected                        | Beta                             | Beta                         | K010356          | N/A*             | 70+           | F   | 48                                                       |
| 17                 | Infected                        | Beta                             | Beta                         | K008633          | EPI_ISL_1229367  | 60-69         | F   | 29                                                       |
| 18                 | Infected                        | Beta                             | Beta                         | K010370          | N/A*             | 30-39         | F   | 31                                                       |
| 19                 | Infected                        | Delta                            | Delta                        | K021407          | EPI_ISL_3722338  | 40-49         | F   | 26                                                       |
| 20                 | Infected                        | Delta                            | Delta                        | K021399          | EPI_ISL_3722335  | 40-49         | M   | 23 <sup>#</sup>                                          |
| 21                 | Infected                        | Delta                            | Delta                        | K021401          | N/A*             | 50-59         | M   | 31                                                       |
| 22                 | Infected                        | Delta                            | Delta                        | K021225          | N/A*             | 40-49         | M   | 13 <sup>#</sup>                                          |
| 23                 | Infected                        | Delta                            | Delta                        | K021400          | N/A*             | 40-49         | M   | 44                                                       |
| 24                 | Infected                        | Delta                            | Delta                        | K021226          | N/A*             | 50-59         | M   | 44                                                       |
| 25                 | Infected                        | Delta                            | Delta                        | K020186          | EPI_ISL_3939068  | 40-49         | M   | 31                                                       |
| 26                 | Infected                        | Delta                            | Delta                        | K020187          | EPI_ISL_3939088  | 30-39         | M   | 31                                                       |
| 27                 | Infected                        | Delta                            | Delta                        | K020214          | EPI_ISL_3447779  | 50-59         | F   | 30 <sup>#</sup>                                          |
| 28                 | Infected                        | Delta                            | Delta                        | K021404          | N/A*             | 30-39         | M   | 32                                                       |
| 29                 | BNT162b2                        | -                                | -                            | -                | -                | 60-69         | M   | 11                                                       |
| 30                 | BNT162b2                        | -                                | -                            | -                | -                | 60-69         | M   | 10                                                       |
| 31                 | BNT162b2                        | -                                | -                            | -                | -                | 50-59         | M   | 18                                                       |
| 32                 | BNT162b2                        | -                                | -                            | -                | -                | 40-49         | F   | 9                                                        |
| 33                 | BNT162b2                        | -                                | -                            | -                | -                | 60-69         | M   | 10                                                       |
| 34                 | BNT162b2                        | -                                | -                            | -                | -                | 20-29         | F   | 8                                                        |
| 35                 | BNT162b2                        | -                                | -                            | -                | -                | 60-69         | M   | 128                                                      |
| 36                 | BNT162b2                        | -                                | -                            | -                | -                | 30-39         | F   | 134                                                      |
| 37                 | BNT162b2                        | -                                | -                            | -                | -                | 20-29         | M   | 131                                                      |
| 38                 | BNT162b2                        | -                                | -                            | -                | -                | 50-59         | M   | 152                                                      |
| 39                 | BNT162b2                        | -                                | -                            | -                | -                | 30-39         | F   | 153                                                      |
| 40                 | BNT162b2                        | -                                | -                            | -                | -                | 30-39         | M   | 158                                                      |

N/A – Not available. \* <90% coverage. Not submitted to GISAID but sufficient sequence for variant call. <sup>§</sup> Not sequenced. <sup>#</sup> Asymptomatic at diagnosis, date post-diagnostic test used instead of symptom onset date.

2 Table S2: Read counts of majority and minority genotypes detected in swab and outgrown virus related to Figure 2

| AA change | Nucleotide change | Codon change | Day 0 Swab | Day 0 Swab | Day 6 Outgrowth Swab | Day 6 Outgrowth Swab | Day 20 Outgrowth Swab | Day 20 Outgrowth Swab | Day 34 Outgrowth Swab | Day 34 Outgrowth Swab | Day 71 Outgrowth Swab | Day 71 Outgrowth Swab | Day 106 Outgrowth Swab | Day 106 Outgrowth Swab | Day 190 Outgrowth Swab | Day 190 Outgrowth Swab |
|-----------|-------------------|--------------|------------|------------|----------------------|----------------------|-----------------------|-----------------------|-----------------------|-----------------------|-----------------------|-----------------------|------------------------|------------------------|------------------------|------------------------|
| 195I      | 21846C>T          | ACT > ATT    | ACT-143    | ACT-6105   | ACT-1342             | ACT-2667             | ACT-1540              | ACT-935               | ACT-96                | ACT-1379              | ACT-1609              | ACT-11843             | ACT-1593               | ACT-231                | ACT-1325               |                        |
|           |                   |              | ATT-0      | ATT-9      | ATT-10               | ATT-298              | ATT-33                | ATT-1626              | ATT-1328              | ATT-36                | ATT-27                | ATT-576               | ATT-29                 | ATT-10                 | ATT-16                 |                        |
| G142Y     | 21987G>T          | GGT>GTT      | GGT-40     | GGT-1386   | GGT-316              | GGT-880              | GGT-1352              | GGT-954               | GGT-1238              | GGT-480               | GGT-1416              | GGT-3621              | GGT-1400               | GGT-133                | GGT-977                |                        |
|           |                   |              | GTT-10     | GTT-622    | GTT-808              | GTT-313              | GTT-4                 | GTT-96                | GTT-14                | GTT-5                 | GTT-12                | GTT-5                 | GTT-22                 | GTT-6                  |                        |                        |
| R190K     | 22131G>A          | AGG>AAG      | AGG-46     | AGG-5591   | AGG-119              | AGG-1702             | AGG-357               | AGG-1685              | AGG-324               | AGG-222               | AGG-26                | Gap in sequence       | AGG-22                 | AGG-13                 | AGG-419                |                        |
|           |                   |              | AAG-0      | AAG-8      | AAG-0                | AAG-1                | AAG-3                 | AAG-2                 | AAG-2                 | AAG-1096              | AAG-378               | sequence              | AAG-468                | AAG-40                 | AAG-33                 |                        |
| *1244del  | 22293 ACA>del     | del-1        | ACA-12     | ACA-1378   | ACA-371              | ACA-50               | ACA-0                 | ACA-17                | ACA-17                | ACA-414               | ACA-692               | ACA-11                | ACA-693                | ACA-64                 | ACA-653                |                        |
|           |                   |              | del-1      | del-0      | del-4                | del-158              | del-635               | del-176               | del-556               | del-4                 | del-3                 | del-0                 | del-7                  | del-0                  | del-1                  |                        |
| K417I     | 22812A>G          | AAG>ACG      | AAG-117    | AAG-3237   | AAG-141              | AAG-3209             | AAG-122               | AAG-2587              | AAG-96                | AAG-299               | AAG-6                 | AAG-32                | AAG-0                  | AAG-0                  | AAG-0                  |                        |
|           |                   |              | ACG-0      | ACG-1      | ACG-0                | ACG-0                | ACG-0                 | ACG-1                 | ACG-0                 | ACG-1362              | ACG-172               | ACG-2                 | ACG-60                 | sequence               | ACG-17                 |                        |
| D427Y     | 22841G>T          | GAT>TAT      | GAT-107    | GAT-3856   | GAT-1281             | GAT-3719             | GAT-1273              | GAT-3434              | GAT-1164              | GAT-3434              | GAT-1079              | GAT-51                | GAT-13                 | GAT-18                 | GAT-6                  |                        |
|           |                   |              | TAT-0      | TAT-3      | TAT-7                | TAT-0                | TAT-1                 | TAT-0                 | TAT-1                 | TAT-0                 | TAT-42                | TAT-4                 | TAT-743                | TAT-103                | TAT-529                |                        |
| L455F     | 22927G>T          | TTG>TTT      | TTG-11     | TTG-3714   | TTG-886              | TTG-3219             | TTG-978               | TTG-4331              | TTG-888               | TTG-2983              | TTG-784               | TTG-527               | TTG-636                | TTG-114                | TTG-454                |                        |
|           |                   |              | TTT-0      | TTT-9      | TTT-0                | TTT-0                | TTT-2                 | TTT-3                 | TTT-3                 | TTT-4                 | TTT-2                 | TTT-317               | TTT-0                  | TTT-0                  | TTT-1                  |                        |
| E456L     | 22928T>C          | TTT>CTT      | TTT-12     | TTT-3739   | TTT-1112             | TTT-3248             | TTT-1109              | TTT-4361              | TTT-1011              | TTT-2971              | TTT-882               | TTT-537               | TTT-725                | TTT-138                | TTT-544                |                        |
|           |                   |              | CTT-0      | CTT-6      | CTT-31               | CTT-0                | CTT-19                | CTT-0                 | CTT-20                | CTT-3                 | CTT-19                | CTT-310               | CTT-2                  | CTT-0                  | CTT-24                 |                        |
| A475Y     | 22986C>T          | GCC>GTC      | GCC-17     | GCC-3409   | GCC-1180             | GCC-3629             | GCC-11                | GCC-2874              | GCC-43                | GCC-3396              | GCC-956               | GCC-901               | GCC-839                | GCC-177                | GCC-687                |                        |
|           |                   |              | GTC-0      | GTC-11     | GTC-30               | GTC-1218             | GTC-1369              | GTC-2421              | GTC-1224              | GTC-101               | GTC-22                | GTC-23                | GTC-24                 | GTC-14                 | GTC-19                 |                        |
| E484K     | 23012G>A          | GAA>AAA      | GAA-17     | GAA-56     | GAA-363              | GAA-1632             | GAA-27                | GAA-2395              | GAA-55                | GAA-3147              | GAA-1120              | GAA-688               | GAA-1001               | GAA-180                | GAA-814                |                        |
|           |                   |              | AAA-0      | AAA-2063   | AAA-917              | AAA-2881             | AAA-1276              | AAA-2139              | AAA-1133              | AAA-196               | AAA-22                | AAA-40                | AAA-5                  | AAA-53                 | AAA-4                  |                        |
| E490S     | 23031T>C          | TTT>TCT      | TTT-18     | TTT-1605   | TTT-1196             | TTT-4067             | TTT-1226              | TTT-4007              | TTT-1031              | TTT-341               | TTT-62                | TTT-182               | TTT-31                 | TTT-89                 | TTT-21                 |                        |
|           |                   |              | TCT-0      | TCT-2      | TCT-15               | TCT-0                | TCT-10                | TCT-8                 | TCT-30                | TCT-2912              | TCT-935               | TCT-446               | TCT-784                | TCT-125                | TCT-669                |                        |
| N501Y     | 23063A>T          | AAT>TAT      | AAT-13     | AAT-810    | AAT-1428             | AAT-2034             | AAT-1498              | AAT-2855              | AAT-1354              | AAT-2510              | AAT-1193              | AAT-282               | AAT-1026               | AAT-19                 | AAT-6                  |                        |
|           |                   |              | TAT-0      | TAT-2      | TAT-2                | TAT-1                | TAT-29                | TAT-10                | TAT-14                | TAT-2                 | TAT-13                | TAT-0                 | TAT-180                | TAT-726                |                        |                        |
| D614G     | 23403A>G          | GAT>GGT      | GAT-3      | GAT-8      | GAT-4                | GAT-0                | GAT-6                 | GAT-3                 | GAT-14                | GAT-3                 | GAT-1                 | GAT-10                | GAT-2                  | GAT-3                  | GAT-3                  |                        |
|           |                   |              | GGT-158    | GGT16668   | GGT 811              | GGT-5299             | GGT-904               | GGT-2863              | GGT-886               | GGT-1560              | GGT-702               | GGT-26                | GGT-827                | GGT-173                | GGT-834                |                        |
| R682W     | 23606C>T          | CGG>TGG      | CGG-98     | CGG-1831   | CGG-189              | CGG-27               | CGG-618               | CGG-59                | CGG-607               | CGG-124               | CGG-523               | CGG-471               | CGG-40                 | CGG-424                | CGG-3                  |                        |
|           |                   |              | TGG-1      | TGG-4      | TGG-407              | TGG-0                | TGG-5                 | TGG-0                 | TGG-3                 | TGG-0                 | TGG-6                 | TGG-1                 | TGG-4                  | TGG-3                  |                        |                        |
| D796Y     | 23948G>T          | GAT>TAT      | GAT-16     | GAT-4293   | GAT-1155             | GAT-1235             | GAT-1409              | GAT-568               | GAT-1313              | GAT-97                | GAT-38                | GAT-7                 | GAT-6                  | GAT-2                  | GAT-12                 |                        |
|           |                   |              | TAT-70     | TAT-16     | TAT-0                | TAT-477              | TAT-5                 | TAT-649               | TAT-10                | TAT-791               | TAT-1257              | TAT-0                 | TAT-1438               | TAT-11                 | TAT-1223               |                        |
| A1078V    | 24795C>T          | GCT>GTT      | GCT-219    | GCT-772    | GCT-772              | GCT-4397             | GCT-1319              | GCT-2519              | GCT-1270              | GCT-1462              | GCT-1418              | GCT-13695             | GCT-1418               | GCT-286                | GCT-1264               |                        |
|           |                   |              | GTT-3      | GTT-4833   | GTT-358              | GTT-1                | GTT-18                | GTT-12                | GTT-45                | GTT-30                | GTT-85                | GTT-74                | GTT-36                 | GTT-17                 | GTT-29                 |                        |

\*Only deletions where the adjacent codon was preserved were counted.

### 3 Figure S1: Spike specific antibody levels with time post-SARS-CoV-2 diagnosis related to Figure 2.

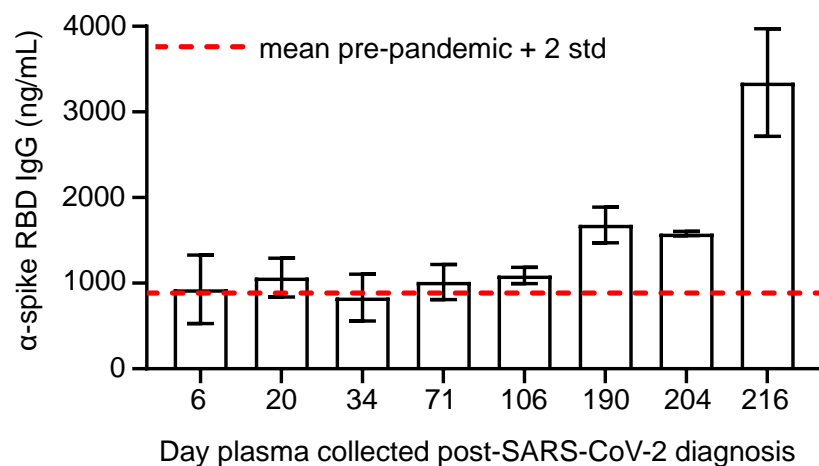

**Fig S 1: Spike specific antibody levels with time post-SARS-CoV-2 diagnosis.** Shown are mean (n=4 replicates per timepoint) and standard deviation of anti-spike RBD antibody concentrations measured in the plasma of the participant with advanced HIV disease by ELISA. Red dashed line denotes the mean + 2 standard deviations of signal from a set of 6 control samples, including plasma of pre-pandemic controls (n=4) and pre-pandemic commercial human serum (n=2).

### 4 Figure S2: Neutralization of Beta variant and evolved virus by a subset of BNT162b2 plasma donors related to Figure 2

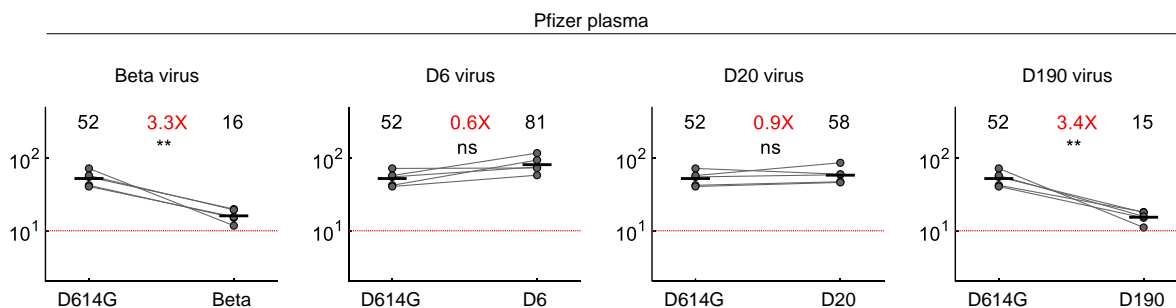

**Fig S 2: Neutralization of Beta variant and evolved virus by a subset of BNT162b2 plasma donors.** Neutralization of Beta, D6, D20, and D190 compared to D614G by Pfizer BNT162b2 plasma (n=5). Plasma donors were 136072, 136074, 136075, 136076, 136078. Red horizontal line denotes most concentrated plasma tested. Numbers in black are GMT FRNT50. Numbers in red are fold-change in GMT between virus strain on left and right. \*\* <0.01-0.001, as determined by the Wilcoxon rank sum test.
